# Supplementary material
Source: Research Square preprint supplement (doi:10.21203/rs.3.rs-9400608/v1)
Supplement: Supplementary file 1 [file 2a2a7310328a209994530cac.docx]

**Supplementary Table 1 – Demographics Table**

| **Demographics** | **Total sample (N = 254)** | **Men (n = 131)** | **Women (n = 123)** | **Sex difference** |
| --- | --- | --- | --- | --- |
| Ethnicity | 100% EU ancestry | 100% EU ancestry | 100% EU ancestry | NA |
| Chronological age (Mean ± SD) | 28.97 ± 0.68 | 28.96 ± 0.67 | 28.98 ± 0.68 | t(252)=−0.16; p=0.871 |
| EpiAGE (Mean ± SD) | −0.04 ± 3.68 | 0.60 ± 3.64 | −0.71 ± 3.62 | t(252)=2.88; p=0.004 |
| CheekAge (Mean ± SD) | −0.08 ± 4.33 | 0.10 ± 4.39 | −0.26 ± 4.28 | t(252)=0.67; p=0.502 |
| AltumAge (Mean ± SD) (N = 252) | −0.22 ± 2.78 | −0.02 ± 2.66 | −0.42 ± 2.89 | t(250) =1.14; p=0.254 |
| **Education** | | | | |
| Completed primary school | 5 (1.9%) | 3 (2.3%) | 2 (1.6%) | χ²(3)=7.10; p=0.069 |
| Completed high school | 62 (24.4%) | 40 (30.5%) | 22 (17.9%) |  |
| Completed university | 183 (72.0%) | 85 (64.9%) | 98 (79.7%) |  |
| Completed post-gradual | 4 (1.6%) | 3 (2.3%) | 1 (0.8%) |  |
| **IQ** | | | | |
| FSIQ (Mean ± SD) | 117.80 ± 15.43 | 118.96 ± 15.47 | 116.57 ± 15.36 | t(252)=1.24; p=0.218 |
| PIQ (Mean ± SD) | 114.06 ± 18.89 | 117.57 ± 18.75 | 110.31 ± 18.40 | t(252)=3.12; p=0.002 |
| VIQ (Mean ± SD) | 119.02 ± 16.44 | 116.59 ± 16.14 | 121.60 ± 16.43 | t(252)=−2.45; p=0.015 |

**Note.** Values are mean ± SD or n (%). Sex differences tested using independent-samples t tests (continuous) or χ² tests (categorical). Two outliers excluded for CheekAge.
