# Supplementary material
Source: Research Square preprint supplement (doi:10.21203/rs.3.rs-9400608/v1)
Supplement: Supplementary file 2 [file af3970cb125d18322d86016c.docx]

**Supplementary Table 2 – Premature epigenetic aging and its relationship with normative brain development.** Significant associations after FDR correction (p < 0.050) are shown in bold.

|  |  |  | **Horvath's clock** | | | | **CheekAge** | | | **AltumAge** | | |
| --- | --- | --- | --- | --- | --- | --- | --- | --- | --- | --- | --- | --- |
| Hem | Region | | | Std Beta | p | FDR p | Std Beta | p | FDR p | Std Beta | p | FDR p |
| **Section A - Surface area (68 DK ROIs)** | | | | | | | | | | | | |
| L | banks sts | | | 0.021 | 0.736 | 0.999 | -0.138 | 0.027 | 0.486 | -0.047 | 0.455 | 0.874 |
| L | caudal anterior cingulate | | | 0.086 | 0.181 | 0.941 | 0.011 | 0.868 | 0.951 | 0.027 | 0.669 | 0.993 |
| L | caudal middle frontal | | | 0.113 | 0.076 | 0.941 | 0.019 | 0.769 | 0.951 | 0.045 | 0.475 | 0.874 |
| L | cuneus | | | -0.040 | 0.534 | 0.999 | 0.059 | 0.352 | 0.922 | -0.061 | 0.336 | 0.846 |
| L | entorhinal | | | 0.017 | 0.790 | 0.999 | -0.019 | 0.759 | 0.951 | 0.027 | 0.662 | 0.993 |
| L | fusiform | | | -0.004 | 0.946 | 0.999 | -0.013 | 0.842 | 0.951 | -0.002 | 0.969 | 0.997 |
| L | inferior parietal | | | 0.076 | 0.235 | 0.941 | -0.026 | 0.684 | 0.951 | 0.102 | 0.104 | 0.709 |
| L | inferior temporal | | | 0.049 | 0.448 | 0.999 | 0.017 | 0.794 | 0.951 | 0.087 | 0.168 | 0.832 |
| L | isthmuscingulate | | | 0.010 | 0.873 | 0.999 | 0.052 | 0.411 | 0.922 | -0.009 | 0.884 | 0.997 |
| L | lateral occipital | | | 0.022 | 0.729 | 0.999 | 0.052 | 0.409 | 0.922 | -0.013 | 0.832 | 0.993 |
| L | lateral orbitofrontal | | | -0.084 | 0.191 | 0.941 | -0.074 | 0.241 | 0.818 | -0.129 | 0.040 | 0.540 |
| L | lingual | | | -0.024 | 0.702 | 0.999 | 0.052 | 0.409 | 0.922 | -0.018 | 0.779 | 0.993 |
| L | medial orbitofrontal | | | -0.096 | 0.131 | 0.941 | 0.075 | 0.236 | 0.818 | -0.164 | 0.009 | 0.540 |
| L | middle temporal | | | 0.001 | 0.992 | 0.999 | -0.021 | 0.746 | 0.951 | 0.082 | 0.197 | 0.832 |
| L | parahippocampal | | | -0.023 | 0.716 | 0.999 | -0.053 | 0.402 | 0.922 | -0.094 | 0.136 | 0.832 |
| L | paracentral | | | -0.083 | 0.197 | 0.941 | -0.084 | 0.182 | 0.781 | 0.006 | 0.924 | 0.997 |
| L | pars opercularis | | | 0.011 | 0.863 | 0.999 | -0.056 | 0.376 | 0.922 | -0.007 | 0.912 | 0.997 |
| L | pars orbitalis | | | -0.094 | 0.140 | 0.941 | -0.021 | 0.735 | 0.951 | -0.066 | 0.294 | 0.832 |
| L | pars triangularis | | | -0.015 | 0.813 | 0.999 | 0.082 | 0.195 | 0.781 | -0.005 | 0.940 | 0.997 |
| L | pericalcarine | | | -0.100 | 0.117 | 0.941 | 0.076 | 0.227 | 0.818 | -0.064 | 0.309 | 0.832 |
| L | postcentral | | | -0.086 | 0.182 | 0.941 | 0.005 | 0.932 | 0.951 | -0.107 | 0.092 | 0.696 |
| L | posterior cingulate | | | 0.063 | 0.329 | 0.985 | -0.048 | 0.453 | 0.933 | -0.017 | 0.794 | 0.993 |
| L | precentral | | | -0.132 | 0.037 | 0.941 | -0.115 | 0.066 | 0.642 | -0.084 | 0.181 | 0.832 |
| L | precuneus | | | 0.045 | 0.485 | 0.999 | 0.143 | 0.023 | 0.486 | 0.139 | 0.027 | 0.540 |
| L | rostral anterior cingulate | | | 0.087 | 0.177 | 0.941 | -0.025 | 0.697 | 0.951 | 0.139 | 0.027 | 0.540 |
| L | rostral middle frontal | | | -0.007 | 0.919 | 0.999 | 0.004 | 0.951 | 0.951 | -0.078 | 0.216 | 0.832 |
| L | superior frontal | | | 0.026 | 0.686 | 0.999 | -0.137 | 0.029 | 0.486 | -0.046 | 0.469 | 0.874 |
| L | superior parietal | | | 0.026 | 0.686 | 0.999 | 0.140 | 0.026 | 0.486 | 0.069 | 0.278 | 0.832 |
| L | superior temporal | | | -0.040 | 0.536 | 0.999 | -0.039 | 0.541 | 0.951 | 0.016 | 0.796 | 0.993 |
| L | supramargil | | | -0.046 | 0.472 | 0.999 | -0.027 | 0.674 | 0.951 | -0.041 | 0.519 | 0.906 |
| L | frontal pole | | | 0.015 | 0.809 | 0.999 | 0.048 | 0.445 | 0.933 | 0.063 | 0.315 | 0.832 |
| L | temporal pole | | | 0.113 | 0.075 | 0.941 | 0.110 | 0.080 | 0.642 | 0.106 | 0.091 | 0.696 |
| L | transverse temporal | | | 0.006 | 0.924 | 0.999 | 0.086 | 0.173 | 0.781 | -0.073 | 0.250 | 0.832 |
| L | insula | | | 0.040 | 0.528 | 0.999 | -0.036 | 0.568 | 0.951 | -0.030 | 0.626 | 0.993 |
| R | banks sts | | | -0.051 | 0.425 | 0.999 | -0.060 | 0.341 | 0.922 | -0.075 | 0.235 | 0.832 |
| R | caudal anterior cingulate | | | -0.073 | 0.249 | 0.941 | -0.065 | 0.299 | 0.922 | -0.071 | 0.259 | 0.832 |
| R | caudal middle frontal | | | 0.015 | 0.818 | 0.999 | -0.012 | 0.854 | 0.951 | -0.007 | 0.908 | 0.997 |
| R | cuneus | | | 0.070 | 0.272 | 0.973 | 0.084 | 0.184 | 0.781 | 0.053 | 0.402 | 0.874 |
| R | entorhinal | | | 0.063 | 0.328 | 0.985 | -0.064 | 0.312 | 0.922 | 0.018 | 0.770 | 0.993 |
| R | fusiform | | | -0.056 | 0.378 | 0.999 | -0.114 | 0.069 | 0.642 | -0.065 | 0.297 | 0.832 |
| R | inferior parietal | | | -0.010 | 0.871 | 0.999 | -0.014 | 0.827 | 0.951 | 0.028 | 0.663 | 0.993 |
| R | inferior temporal | | | 0.046 | 0.472 | 0.999 | -0.060 | 0.345 | 0.922 | 0.056 | 0.376 | 0.874 |
| R | isthmuscingulate | | | 0.030 | 0.643 | 0.999 | 0.008 | 0.905 | 0.951 | -0.002 | 0.978 | 0.997 |
| R | lateral occipital | | | 0.002 | 0.973 | 0.999 | 0.021 | 0.741 | 0.951 | 0.059 | 0.352 | 0.854 |
| R | lateral orbitofrontal | | | 0.002 | 0.979 | 0.999 | -0.093 | 0.139 | 0.781 | -0.121 | 0.054 | 0.615 |
| R | lingual | | | 0.022 | 0.732 | 0.999 | 0.041 | 0.511 | 0.940 | 0.012 | 0.851 | 0.997 |
| R | medial orbitofrontal | | | 0.027 | 0.674 | 0.999 | -0.026 | 0.685 | 0.951 | -0.052 | 0.410 | 0.874 |
| R | middle temporal | | | -0.013 | 0.846 | 0.999 | 0.009 | 0.882 | 0.951 | 0.025 | 0.691 | 0.993 |
| R | parahippocampal | | | 0.024 | 0.712 | 0.999 | 0.044 | 0.487 | 0.940 | -0.047 | 0.458 | 0.874 |
| R | paracentral | | | 0.005 | 0.934 | 0.999 | 0.020 | 0.753 | 0.951 | -0.041 | 0.515 | 0.906 |
| R | pars opercularis | | | 0.098 | 0.127 | 0.941 | -0.011 | 0.863 | 0.951 | 0.019 | 0.769 | 0.993 |
| R | pars orbitalis | | | -8.272400440340402e-05 | 0.999 | 0.999 | -0.102 | 0.103 | 0.642 | -0.108 | 0.084 | 0.696 |
| R | pars triangularis | | | 0.073 | 0.247 | 0.941 | 0.042 | 0.506 | 0.940 | 0.014 | 0.825 | 0.993 |
| R | pericalcarine | | | 0.009 | 0.883 | 0.999 | 0.105 | 0.095 | 0.642 | 0.015 | 0.816 | 0.993 |
| R | postcentral | | | 0.020 | 0.756 | 0.999 | -0.004 | 0.946 | 0.951 | 0.031 | 0.622 | 0.993 |
| R | posterior cingulate | | | 0.075 | 0.238 | 0.941 | 0.007 | 0.907 | 0.951 | 0.066 | 0.293 | 0.832 |
| R | precentral | | | -0.068 | 0.288 | 0.978 | -0.050 | 0.421 | 0.922 | -0.006 | 0.919 | 0.997 |
| R | precuneus | | | 0.060 | 0.348 | 0.985 | 0.109 | 0.083 | 0.642 | 0.134 | 0.033 | 0.540 |
| R | rostral anterior cingulate | | | -0.032 | 0.620 | 0.999 | 0.031 | 0.628 | 0.951 | 0.021 | 0.744 | 0.993 |
| R | rostral middle frontal | | | -0.028 | 0.663 | 0.999 | -0.042 | 0.510 | 0.940 | -0.048 | 0.447 | 0.874 |
| R | superior frontal | | | -0.034 | 0.597 | 0.999 | -0.025 | 0.689 | 0.951 | -0.062 | 0.318 | 0.832 |
| R | superior parietal | | | 0.034 | 0.594 | 0.999 | 0.103 | 0.104 | 0.642 | 0.074 | 0.239 | 0.832 |
| R | superior temporal | | | -0.051 | 0.431 | 0.999 | -0.032 | 0.616 | 0.951 | -0.052 | 0.415 | 0.874 |
| R | supramargil | | | 0.033 | 0.606 | 0.999 | 0.037 | 0.562 | 0.951 | 0.001 | 0.991 | 0.997 |
| R | frontal pole | | | -0.108 | 0.092 | 0.941 | -0.086 | 0.175 | 0.781 | -0.015 | 0.808 | 0.993 |
| R | temporal pole | | | 0.061 | 0.341 | 0.985 | -0.035 | 0.584 | 0.951 | 0.000 | 0.997 | 0.997 |
| R | transverse temporal | | | 0.082 | 0.201 | 0.941 | 0.020 | 0.754 | 0.951 | 0.029 | 0.646 | 0.993 |
| R | insula | | | 5.875074128913142e-05 | 0.999 | 0.999 | 0.007 | 0.916 | 0.951 | -0.020 | 0.746 | 0.993 |
| **Section B - Cortical thickness (68 DK ROIs)** | | | | | | | | | | | | |
| L | banks sts | | | -0.094 | 0.141 | 0.908 | -0.086 | 0.174 | 0.825 | -0.130 | 0.040 | 0.566 |
| L | caudal anterior cingulate | | | 0.019 | 0.767 | 0.930 | -0.051 | 0.421 | 0.825 | 0.123 | 0.049 | 0.566 |
| L | caudal middle frontal | | | 0.051 | 0.428 | 0.908 | -0.005 | 0.935 | 0.967 | 0.082 | 0.191 | 0.764 |
| L | cuneus | | | -0.001 | 0.985 | 0.987 | -0.031 | 0.618 | 0.855 | 0.090 | 0.153 | 0.691 |
| L | entorhinal | | | 0.055 | 0.385 | 0.908 | 0.029 | 0.636 | 0.855 | -0.022 | 0.723 | 0.894 |
| L | fusiform | | | 0.042 | 0.506 | 0.908 | -0.003 | 0.964 | 0.979 | 0.106 | 0.091 | 0.618 |
| L | inferior parietal | | | 0.037 | 0.565 | 0.908 | -0.011 | 0.858 | 0.957 | -0.075 | 0.238 | 0.784 |
| L | inferior temporal | | | 0.031 | 0.629 | 0.930 | -0.016 | 0.797 | 0.954 | 0.066 | 0.298 | 0.784 |
| L | isthmuscingulate | | | -0.038 | 0.553 | 0.908 | -0.046 | 0.470 | 0.825 | 0.070 | 0.272 | 0.784 |
| L | lateral occipital | | | 0.128 | 0.044 | 0.908 | 0.172 | 0.006 | 0.393 | 0.116 | 0.064 | 0.609 |
| L | lateral orbitofrontal | | | 0.091 | 0.153 | 0.908 | 0.085 | 0.174 | 0.825 | 0.046 | 0.459 | 0.784 |
| L | lingual | | | -0.027 | 0.673 | 0.930 | -0.014 | 0.829 | 0.957 | 0.073 | 0.247 | 0.784 |
| L | medial orbitofrontal | | | 0.045 | 0.484 | 0.908 | -0.037 | 0.563 | 0.855 | 0.059 | 0.349 | 0.784 |
| L | middle temporal | | | -0.094 | 0.139 | 0.908 | -0.076 | 0.223 | 0.825 | -0.056 | 0.371 | 0.784 |
| L | parahippocampal | | | 0.023 | 0.720 | 0.930 | 0.100 | 0.111 | 0.825 | 0.054 | 0.390 | 0.784 |
| L | paracentral | | | 0.070 | 0.275 | 0.908 | 0.051 | 0.422 | 0.825 | 0.032 | 0.608 | 0.844 |
| L | pars opercularis | | | 0.004 | 0.950 | 0.987 | 0.044 | 0.482 | 0.825 | 0.026 | 0.684 | 0.883 |
| L | pars orbitalis | | | 0.049 | 0.446 | 0.908 | 0.091 | 0.151 | 0.825 | -0.048 | 0.451 | 0.784 |
| L | pars triangularis | | | -0.096 | 0.133 | 0.908 | -0.103 | 0.103 | 0.825 | -0.056 | 0.375 | 0.784 |
| L | pericalcarine | | | -0.013 | 0.843 | 0.944 | 0.051 | 0.423 | 0.825 | 0.052 | 0.407 | 0.784 |
| L | postcentral | | | -0.039 | 0.548 | 0.908 | -0.016 | 0.799 | 0.954 | -0.046 | 0.469 | 0.784 |
| L | posterior cingulate | | | 0.065 | 0.307 | 0.908 | -0.045 | 0.473 | 0.825 | 0.109 | 0.083 | 0.618 |
| L | precentral | | | 0.072 | 0.262 | 0.908 | 0.055 | 0.386 | 0.825 | 0.027 | 0.665 | 0.883 |
| L | precuneus | | | -0.037 | 0.569 | 0.908 | -0.033 | 0.606 | 0.855 | -0.013 | 0.838 | 0.951 |
| L | rostral anterior cingulate | | | -0.086 | 0.180 | 0.908 | 0.031 | 0.627 | 0.855 | -0.042 | 0.507 | 0.784 |
| L | rostral middle frontal | | | -0.048 | 0.456 | 0.908 | 0.053 | 0.403 | 0.825 | -0.025 | 0.688 | 0.883 |
| L | superior frontal | | | -0.033 | 0.610 | 0.930 | 0.035 | 0.575 | 0.855 | 0.006 | 0.921 | 0.963 |
| L | superior parietal | | | -0.012 | 0.854 | 0.944 | -0.005 | 0.935 | 0.967 | -0.036 | 0.566 | 0.826 |
| L | superior temporal | | | -0.016 | 0.807 | 0.930 | 0.100 | 0.113 | 0.825 | 0.008 | 0.896 | 0.952 |
| L | supramargil | | | -0.060 | 0.346 | 0.908 | -0.059 | 0.353 | 0.825 | -0.093 | 0.141 | 0.691 |
| L | frontal pole | | | -0.003 | 0.960 | 0.987 | -0.010 | 0.877 | 0.962 | -0.088 | 0.162 | 0.691 |
| L | temporal pole | | | -0.023 | 0.718 | 0.930 | 0.020 | 0.748 | 0.935 | 0.000 | 0.997 | 0.998 |
| L | transverse temporal | | | -0.001 | 0.987 | 0.987 | -0.005 | 0.939 | 0.967 | -0.009 | 0.881 | 0.951 |
| L | insula | | | -0.090 | 0.159 | 0.908 | 0.055 | 0.379 | 0.825 | -0.010 | 0.874 | 0.951 |
| R | banks sts | | | 0.101 | 0.113 | 0.908 | -0.025 | 0.687 | 0.898 | 0.043 | 0.494 | 0.784 |
| R | caudal anterior cingulate | | | -0.038 | 0.547 | 0.908 | -0.128 | 0.041 | 0.825 | -0.036 | 0.571 | 0.826 |
| R | caudal middle frontal | | | 0.029 | 0.649 | 0.930 | -0.041 | 0.519 | 0.840 | 0.055 | 0.384 | 0.784 |
| R | cuneus | | | 0.046 | 0.471 | 0.908 | 0.062 | 0.322 | 0.825 | 0.090 | 0.154 | 0.691 |
| R | entorhinal | | | 0.016 | 0.803 | 0.930 | 0.066 | 0.294 | 0.825 | 0.042 | 0.499 | 0.784 |
| R | fusiform | | | -0.052 | 0.418 | 0.908 | -0.099 | 0.115 | 0.825 | -0.036 | 0.567 | 0.826 |
| R | inferior parietal | | | -0.083 | 0.193 | 0.908 | -0.065 | 0.307 | 0.825 | -0.095 | 0.133 | 0.691 |
| R | inferior temporal | | | -0.038 | 0.557 | 0.908 | -0.043 | 0.493 | 0.825 | -0.011 | 0.866 | 0.951 |
| R | isthmuscingulate | | | -0.058 | 0.363 | 0.908 | 0.019 | 0.757 | 0.935 | 0.044 | 0.487 | 0.784 |
| R | lateral occipital | | | 0.062 | 0.331 | 0.908 | 0.052 | 0.411 | 0.825 | 0.075 | 0.232 | 0.784 |
| R | lateral orbitofrontal | | | -0.007 | 0.919 | 0.987 | 0.045 | 0.481 | 0.825 | -0.021 | 0.741 | 0.899 |
| R | lingual | | | -0.018 | 0.776 | 0.930 | 0.039 | 0.536 | 0.848 | 0.130 | 0.037 | 0.566 |
| R | medial orbitofrontal | | | 0.055 | 0.393 | 0.908 | -0.113 | 0.073 | 0.825 | -0.049 | 0.438 | 0.784 |
| R | middle temporal | | | 0.094 | 0.141 | 0.908 | 0.030 | 0.641 | 0.855 | 0.043 | 0.501 | 0.784 |
| R | parahippocampal | | | 0.023 | 0.718 | 0.930 | 0.086 | 0.166 | 0.825 | 0.010 | 0.870 | 0.951 |
| R | paracentral | | | -0.042 | 0.510 | 0.908 | 0.076 | 0.227 | 0.825 | -0.020 | 0.758 | 0.904 |
| R | pars opercularis | | | 0.084 | 0.184 | 0.908 | 0.091 | 0.147 | 0.825 | -0.034 | 0.591 | 0.837 |
| R | pars orbitalis | | | -0.054 | 0.403 | 0.908 | 0.053 | 0.406 | 0.825 | -0.066 | 0.300 | 0.784 |
| R | pars triangularis | | | -0.032 | 0.617 | 0.930 | -0.001 | 0.992 | 0.992 | -0.102 | 0.104 | 0.643 |
| R | pericalcarine | | | -0.056 | 0.380 | 0.908 | 0.121 | 0.052 | 0.825 | 0.072 | 0.248 | 0.784 |
| R | postcentral | | | -0.018 | 0.780 | 0.930 | -0.067 | 0.291 | 0.825 | -0.002 | 0.977 | 0.998 |
| R | posterior cingulate | | | 0.036 | 0.574 | 0.908 | -0.043 | 0.497 | 0.825 | -0.044 | 0.485 | 0.784 |
| R | precentral | | | -0.021 | 0.746 | 0.930 | 0.013 | 0.837 | 0.957 | -0.050 | 0.422 | 0.784 |
| R | precuneus | | | -0.126 | 0.049 | 0.908 | -0.057 | 0.364 | 0.825 | -0.155 | 0.014 | 0.479 |
| R | rostral anterior cingulate | | | 0.038 | 0.552 | 0.908 | -0.074 | 0.241 | 0.825 | 0.027 | 0.673 | 0.883 |
| R | rostral middle frontal | | | 0.021 | 0.742 | 0.930 | -0.032 | 0.606 | 0.855 | -0.047 | 0.448 | 0.784 |
| R | superior frontal | | | -0.018 | 0.773 | 0.930 | -0.012 | 0.851 | 0.957 | -0.123 | 0.050 | 0.566 |
| R | superior parietal | | | 0.047 | 0.463 | 0.908 | 0.070 | 0.266 | 0.825 | 0.014 | 0.825 | 0.951 |
| R | superior temporal | | | 0.056 | 0.384 | 0.908 | -0.056 | 0.371 | 0.825 | 0.000 | 0.998 | 0.998 |
| R | supramargil | | | -0.110 | 0.083 | 0.908 | -0.052 | 0.410 | 0.825 | -0.066 | 0.295 | 0.784 |
| R | frontal pole | | | -0.011 | 0.861 | 0.944 | -0.022 | 0.729 | 0.935 | -0.114 | 0.072 | 0.609 |
| R | temporal pole | | | 0.050 | 0.438 | 0.908 | 0.005 | 0.935 | 0.967 | -0.023 | 0.715 | 0.894 |
| R | transverse temporal | | | -0.071 | 0.265 | 0.908 | -0.060 | 0.340 | 0.825 | -0.188 | 0.003 | 0.176 |
| R | insula | | | -0.004 | 0.956 | 0.987 | 0.050 | 0.432 | 0.825 | 0.050 | 0.430 | 0.784 |
| **Section C - Subcortical volume (14 ROIs)** | | | | | | | | | | | | |
| L | thalamus | | | -0.051 | 0.420 | 0.566 | -0.015 | 0.811 | 0.946 | -0.004 | 0.950 | 0.950 |
| R | thalamus | | | -0.038 | 0.543 | 0.634 | -0.038 | 0.538 | 0.775 | -0.026 | 0.672 | 0.724 |
| **L** | **caudate** | | | -0.198 | 0.002 | **0.012** | -0.065 | 0.299 | 0.697 | -0.079 | 0.212 | 0.631 |
| **R** | **caudate** | | | -0.212 | 0.001 | **0.011** | -0.074 | 0.240 | 0.671 | -0.103 | 0.102 | 0.631 |
| **L** | **putamen** | | | -0.182 | 0.004 | **0.017** | -0.075 | 0.230 | 0.671 | -0.062 | 0.319 | 0.631 |
| **R** | **putamen** | | | -0.159 | 0.013 | **0.044** | -0.101 | 0.109 | 0.671 | -0.081 | 0.197 | 0.631 |
| L | pallidum | | | -0.049 | 0.445 | 0.566 | 0.087 | 0.167 | 0.671 | -0.066 | 0.292 | 0.631 |
| R | pallidum | | | -0.084 | 0.184 | 0.391 | 0.001 | 0.989 | 0.989 | -0.052 | 0.406 | 0.631 |
| L | hippocampus | | | -0.093 | 0.135 | 0.379 | 0.009 | 0.887 | 0.955 | 0.032 | 0.602 | 0.702 |
| R | hippocampus | | | -0.054 | 0.378 | 0.566 | 0.027 | 0.663 | 0.844 | 0.051 | 0.401 | 0.631 |
| L | amygdala | | | 0.032 | 0.616 | 0.663 | 0.114 | 0.065 | 0.671 | 0.071 | 0.254 | 0.631 |
| R | amygdala | | | 0.024 | 0.700 | 0.700 | 0.039 | 0.526 | 0.775 | 0.043 | 0.487 | 0.682 |
| L | accumbens | | | -0.082 | 0.195 | 0.391 | -0.037 | 0.553 | 0.775 | 0.064 | 0.309 | 0.631 |
| R | accumbens | | | -0.076 | 0.230 | 0.403 | -0.042 | 0.503 | 0.775 | 0.034 | 0.591 | 0.702 |
|  |  | | |  |  |  |  |  |  |  |  |  |
